1 **Diminished neutralization responses towards SARS-CoV-2 Omicron VoC after mRNA or**  
2 **vector-based COVID-19 vaccinations**

3 Henning Jacobsen<sup>#,1</sup>, Monika Strengert<sup>#,2,3</sup>, Henrike Maaß<sup>\*,1</sup>, Mario Alberto Ynga Durand<sup>\*,1</sup>, Barbora  
4 Kessel<sup>2</sup>, Manuela Harries<sup>2</sup>, Ulfert Rand<sup>1</sup>, Leila Abassi<sup>1</sup>, Yeonsu Kim<sup>1</sup>, Tatjana Lüddecke<sup>1</sup>, Pilar Hernandez<sup>2</sup>,  
5 Julia Ortmann<sup>2</sup>, Jana-Kristin Heise<sup>2</sup>, Stefanie Castell<sup>2</sup>, Daniela Gornyk<sup>2</sup>, Stephan Glöckner<sup>2</sup>, Vanessa  
6 Melhorn<sup>2</sup>, Yvonne Kemmling<sup>2</sup>, Berit Lange<sup>2,5</sup>, Alex Dulovic<sup>4</sup>, Julia Häring<sup>4</sup>, Daniel Junker<sup>4</sup>, Nicole  
7 Schneiderhan-Marra<sup>4</sup>, Markus Hoffmann<sup>6,7</sup>, Stefan Pöhlmann<sup>6,7</sup>, Gérard Krause<sup>2,3,5,§</sup>, Luka Cicin-Sain<sup>1,5,8,§</sup>

8 1 Helmholtz Centre for Infection Research, Department of Viral Immunology, Braunschweig, Germany

9 2 Helmholtz Centre for Infection Research, Department of Epidemiology Braunschweig, Germany

10 3 TWINCORE, Centre for Experimental and Clinical Infection Research, a joint venture of the Hannover  
11 Medical School and the Helmholtz Centre for Infection Research, Hannover, Germany

12 4 NMI Natural and Medical Sciences Institute at the University of Tübingen, Reutlingen, Germany

13 5 German Centre for Infection Research (DZIF), partner site Hannover-Braunschweig, Germany

14 6 Deutsches Primatenzentrum, Leibniz-Institut für Primatenforschung, Göttingen, Germany

15 7 Faculty of Biology and Psychology, Georg-August-University Göttingen, Germany

16 8 Centre for Individualized Infection Medicine (CIIM), a joint venture of Helmholtz Centre for Infection  
17 Research and Medical School Hannover, Germany

18  
19 # (first authors), \* (second authors), § (corresponding authors): these authors contributed equally.

20  
21 Corresponding authors contact details:

22 Luka Cicin-Sain, Phone number: +49 (0)53161814616, Email address: [luka.cicin-sain@helmholtz-hzi.de](mailto:luka.cicin-sain@helmholtz-hzi.de),

23 Postal address: Inhoffenstraße 7, 38124 Braunschweig, Germany.

24

25

26 **Abstract**

27 SARS-CoV-2 variants accumulating immune escape mutations provide a significant risk to vaccine-  
28 induced protection. The novel variant of concern (VoC) Omicron (B.1.1.529) has the largest number of  
29 amino acid alterations in its Spike protein to date. Thus, it may efficiently escape recognition by neutralizing  
30 antibodies, allowing breakthrough infections in convalescent and vaccinated individuals. We analyzed  
31 neutralization activity of sera from individuals after vaccination with all mRNA-, vector- or heterologous  
32 immunization schemes currently available in Europe by *in vitro* neutralization assay at peak response  
33 towards SARS-CoV-2 B.1, Omicron, Beta and Delta pseudotypes and also provide longitudinal follow-up  
34 data from BNT162b2 vaccinees. All vaccines apart from Ad26.CoV2.S showed high levels of responder  
35 rates (93-100%) towards SARS-CoV-2 wild-type, but some reductions in neutralizing Beta and Delta VoC  
36 pseudotypes. The novel Omicron variant had the biggest impact, both in terms of response rates and  
37 neutralization titers. Only mRNA-1273 showed a 100% response rate to Omicron and induced the highest  
38 level of neutralizing antibody titers, followed by heterologous prime-boost approaches. Homologous  
39 BNT162b2 vaccination or vector-based AZD1222 or Ad26.CoV2.S performed less well with peak  
40 responder rates of 33%, 50% and 9%, respectively. However, Omicron responder rates in BNT162b2  
41 recipients were maintained in our six month longitudinal follow-up indicating that individuals with cross-  
42 protection against Omicron maintain it over time. Overall, our data strongly argues for urgent booster doses  
43 in individuals who were previously vaccinated with BNT162b2, or a vector-based immunization scheme.

44 **Keywords**

45 SARS-CoV-2, Omicron B.1.1.529, variants of concern, protective immunity, neutralization, COVID-19  
46 vaccination

47

48

## 49 1. Introduction

50 Since its emergence in late 2019, SARS-CoV-2 has caused a pandemic with more than 270 million  
51 confirmed infections and more than 5 million deaths (1). While a series of vaccines have been developed  
52 with unprecedented speed and were successfully deployed to limit the burden of COVID-19, it became  
53 quickly apparent that novel SARS-CoV-2 variants had evolved, mainly in areas of high virus prevalence.  
54 Those emerging variants have accumulated mutations in the surface-exposed Spike protein, which increase  
55 virus transmissibility or promote evasion from the host immune response (2-4). Immune escape was most  
56 pronounced in SARS-CoV-2 variants Beta (B.1.351) and the currently globally dominating Delta  
57 (B.1.617.2), at least until recently. However, the November 2021 emergence of the variant B.1.1.529  
58 (Omicron) in South Africa has raised strong concerns as its unusually high number of amino acid alterations  
59 in the Spike protein will likely contribute to an increased reinfection risk or breakthrough infections  
60 following vaccination (5). By now, a series of studies using samples from convalescent and vaccinated  
61 individuals have addressed the impact of Omicron on vaccination or infection-induced antibody  
62 neutralization, using either live-, pseudovirus neutralization or *in vitro* binding assays (6-14). These studies  
63 have shown clear losses of neutralization capacity against the Omicron variant but did not comprehensively  
64 address antibody responses in various vaccination regimens or over time. In contrast, we provide here a  
65 comprehensive assessment of vaccination schemes approved in the European Union and the UK, using an  
66 Omicron, Beta, Delta or wild-type (B.1) pseudo-neutralization assay at peak response after approximately  
67 four weeks and in a longitudinal six month follow-up for BNT162b2.

## 68 2. Methods

### 69 2.1 Sample collection and ethics statement

70 Serum samples analysed in this study originate from vaccinated participants of the multi-local and serial  
71 cross-sectional prevalence study on antibodies against SARS-CoV-2 in Germany (MuSPAD) study, a  
72 population-based SARS-CoV-2 seroprevalence study in eight regions of Germany from July 2020 to  
73 August 2021. The study was approved by the Ethics Committee of the Hannover Medical School  
74 (9086\_BO\_S\_2020) and was in line with the Declaration of Helsinki. Briefly, MuSPAD is a successive  
75 cross-sectional study where certain locations were sampled longitudinally within a 3-4 month interval (15).  
76 Recruitment of eligible participants (>18 years) was based on age- and sex-stratified random sampling with  
77 information provided by the respective local residents' registration offices. Basic sociodemographic data  
78 and information on pre-existing medical conditions including a previous SARS-CoV-2 infection or  
79 vaccination are self-reported and were documented with the Research system PIA (Prospective Monitoring  
80 and Management-App) at the study center. Peripheral blood was obtained by venipuncture using a serum  
81 gel S-Monovette (Sarstedt) and further processed according to the manufacturer's instructions. Serum was  
82 then aliquoted at the German Red Cross Institute of Transfusion Medicine and Immunohematology and  
83 transported on dry ice to the Hannover Unified Biobank for long-term storage.

84 For this study, we selected samples from 82 vaccinees from the available MuSPAD sample pool to contain  
85 mRNA, vector and heterologous immunization schemes. Selection was primarily based on a consistent 21-  
86 35 day  $\Delta T$  range from a complete vaccination until sampling with comparable age and gender distribution  
87 between vaccination schemes, if available paired longitudinal follow-up samples were selected of samples  
88 taken at peak response. None of the donors reported a positive SARS-CoV-2 antigen or PCR test result  
89 when questioned at the study center at the time of the blood draw. Additionally, all collected serum samples  
90 were non-reactive for nucleocapsid-specific IgG as determined with a previously published multiplex  
91 immunoassay MULTICOV-AB that contains SARS-CoV-2 Spike and nucleocapsid antigens  
92 (Supplementary Table S3, (16)), therefore excluding confounders due to infections superposed on  
93 vaccination in our cohort. Vaccination details with basic sociodemographic information and pre-existing  
94 conditions such as hypertension, cardiovascular disease, diabetes, lung disease, immunosuppression or  
95 cancer of participants are provided in Table 1 and Supplementary Table S1. As controls, the first WHO  
96 International Standard for human anti-SARS-CoV-2 immunoglobulin (code: 20/136) from the National

97 Institute for Biological Standards and Control (NIBSC) or pre-pandemic sera samples from an anonymized  
98 Hepatitis A and Influenza virus vaccination response study at the Helmholtz Centre for Infection Research  
99 in 2014 (Hannover Medical School Ethics Committee approval number 2198-2021) were used.

## 100 *2.2 Cell culture*

101 Vero E6 (ATCC CRL-1586), and 293T (DSMZ ACC-635) were maintained in DMEM medium  
102 supplemented with 10% fetal bovine serum (FBS), 2 mM L-glutamine, 100 U/ml penicillin and 100 µg/ml  
103 streptomycin at 37 °C in a 5% CO<sub>2</sub> atmosphere. All cell lines used within this study were below a passage  
104 of 50 and were regularly checked for mycoplasma contamination. Transfection of 293T cells was performed  
105 using calcium-phosphate.

## 106 *2.3 Plasmids*

107 Plasmids encoding SARS-CoV-2 Spike B.1 (human codon optimized, 18 amino acid truncation at C-  
108 terminus) and SARS-CoV-2 spike of Beta (B.1.351) and Delta (B.1.617.2) have been previously reported  
109 (17-19). The expression vector for SARS-CoV-2 Spike of Omicron (based on isolate hCoV-  
110 19/Botswana/R40B58\_BHP\_3321001245/2021; GISAID Accession ID: EPI\_ISL\_6640919) was  
111 generated by Gibson assembly (13). All plasmids were sequence-confirmed by Sanger sequencing prior to  
112 use. Supplementary Table S2 provides an overview of Spike protein amino acid mutations used for SARS-  
113 CoV-2 pseudotype construction compared to the parental strain B.1.

## 114 *2.4 Pseudotyping*

115 Generation of rhabdoviral pseudotypes harboring SARS-CoV-2 Spike proteins was performed as described  
116 (20). In brief, 293T cells were transfected with pCG1 plasmids expressing different SARS-CoV-2 Spike  
117 proteins, using calcium-phosphate. 24 h post transfection, cells were infected with a replication-deficient  
118 reporter VSV-G (VSV\*ΔG-Fluc) at an MOI of 3 for 1 h at 37 °C (21). Cells were washed once with PBS  
119 and medium containing anti-VSV-G antibody (culture supernatant from L1-hybridoma cells) was added to  
120 neutralize residual input virus. The cell culture supernatant was harvested after 16 hours, and cellular debris  
121 was removed by centrifugation at 2000 g for 5 min at 4 °C. Aliquots were stored at -80°C until use.

## 122 *2.5 Neutralization assay*

123 For pseudovirus neutralization, serum samples and controls were heat-inactivated at 56 °C for 30 min.  
124 Thawed samples and controls were stored at 4°C for no longer than 48 hours, prior to use. In a 96-well  
125 microtiter plate, serum samples were 2-fold serially diluted in cell culture medium (DMEM, 5 % FBS, 1%  
126 P/S, 1% L-Glu) with a dilution range of 1:10 to 1:5120. Pre-diluted samples were incubated with an equal  
127 volume of Spike protein-bearing viral particles (approximately 200 - 500 ffu/well) at 37 °C for 1 h. After  
128 incubation, the sample-virus mixture was transferred to VeroE6 cells at 100% confluence which were  
129 seeded the day before. Cells were incubated at 37 °C for 24±2 h, while infected cells were visualized using  
130 an IncuCyte S3 (Sartorius) performing whole-well scans (4x) in phase contrast and green fluorescence  
131 settings. Automated segmentation and counting of fluorescent foci defined as GFP<sup>+</sup>-single cells was  
132 performed using the IncuCyte GUI software (versions 2019B Rev1 and 2021B). Raw data were plotted in  
133 GraphPad prism version 9.0.2 and FRNT<sub>50</sub> was calculated with a variable slope, four- parameter regression  
134 analysis. Non-responders were defined as subjects with undetectable neutralization titers at an initial serum  
135 dilution of 1:10. FRNT<sub>50</sub> values of those individuals were arbitrarily set to 1. All experiments were  
136 performed with internal standard controls (pool of all tested sera), negative controls and virus-only controls  
137 to assess the nominal virus input for every single measurement.

## 138 *2.6 Data analysis and statistics*

139 Initial results collation and matching to metadata was done in Excel 2016 and R 4.1.0. Graphs and statistical  
140 calculations were performed using GraphPad Prism version 9.0.2 for Windows (GraphPad Software). For  
141 analysis of neutralization assay results, a Shapiro-Wilk test was used to determine normality. Focus

142 Reduction Neutralization titer with a 50% neutralization cut-off (FRNT<sub>50</sub>) was calculated using a four-  
143 parameter regression analysis function. FRNT<sub>50</sub> values from non-responders were set to 1 for graphical  
144 presentation only. A non-parametric Friedman's test followed by Dunn's multiple comparison analysis was  
145 used to compare neutralization results to different viruses in a pair-wise manner for matched samples. Two-  
146 tailed Wilcoxon matched-pairs signed rank test was used to compare neutralization of longitudinal results.  
147 A p-value of less than 0.05 was considered statistically significant.

### 148 *2.7 Role of the funders*

149 This work was financially supported by the Initiative and Networking Fund of the Helmholtz Association  
150 of German Research Centres through projects “Virological and immunological determinants of COVID-19  
151 pathogenesis – lessons to get prepared for future pandemics (KA1-Co-02 “COVIPA”) to LCS and grant  
152 number SO-96 to GK, by the Deutsche Forschungsgemeinschaft (DFG, German Research Foundation)  
153 under Germany’s Excellence Strategy – EXC 2155 “RESIST” – Project ID 39087428 to LCS, and  
154 intramural funds of the Helmholtz Centre for Infection Research. SP was supported by BMBF (01KI2006D,  
155 01KI20328A, 01KX2021), the Ministry for Science and Culture of Lower Saxony (14-76103-184, MWK  
156 HZI COVID-19) and the German Research Foundation (DFG; PO 716/11-1, PO 716/14-1). The funders  
157 had no role in study design, data collection, data analysis, interpretation, writing or submission of the  
158 manuscript. All authors had complete access to the data and hold responsibility for the decision to submit  
159 for publication.

## 160 **3. Results**

161 Neutralization responses towards B.1, B.1.1.529, B.1.351, and B.1.617.2 Spike-expressing rhabdoviral  
162 pseudotypes were analyzed in serum samples from 82 individuals vaccinated with either a single dose of  
163 Ad26.COVS.2.S, homologous two-dose BNT162b2, mRNA-1273 or AZD1222 vaccination, or heterologous  
164 AZD1222-BNT162b2 or AZD1222-mRNA-1273 vaccination at peak response, approximately four weeks  
165 after the last dose. While the WHO international standard serum showed detectable neutralization against  
166 all variants including Omicron, showing excellent sensitivity of our assay, compared to previous studies  
167 (22), pre-pandemic control sera from 2014 (n=4) showed no measurable neutralization levels  
168 (Supplementary Table S3). Neutralization potency towards Beta VoC pseudotypes were clearly reduced for  
169 all vaccination schemes, however Omicron had the strongest effect across all samples tested (Fig. 1).  
170 Vaccination with vector-based Ad26.CoV2.S performed least well (Fig. 1a), with only 73% responders  
171 against the B.1 variant, 18% for the Beta and 9% for Omicron VoC. Homologous vaccination with either  
172 AZD1222 or BNT162b2 performed better against Omicron, with 50% or 33% responders, respectively  
173 (Fig. 1b, 1c). Heterologous immunization with these two vaccines (AZD1222-BNT162b2) showed a  
174 response rate of 80% (Fig. 1d). Heterologous vaccination with AZD1222-mRNA-1273 had a similar  
175 response rate of 82% (Fig. 1e), but homologous immunization with mRNA-1273 had the highest Omicron  
176 response rate of 100% (Fig. 1f). Non-parametrical statistical comparisons showed a highly significant  
177 reduction in serum titers when Omicron neutralization was compared to B.1 for all vaccination schemes  
178 (Fig 1a-e). There was no tendency of age, sex, or pre-existing medical conditions to modify the responder  
179 status against Omicron in our cohort (Supplementary Table S3). To assess the impact of immune escape  
180 with more detail, we focused on the responders and compared geometric means of their FRNT<sub>50</sub> titers  
181 (GMT). Importantly, fold-changes for groups that included non-responders are not provided in Fig. 1,  
182 because this would lead to highly artificial results and possibly over-interpretation. We therefore present  
183 the percentage of responders as primary outcome and provide GMT fold changes where calculation is  
184 reasonable (100% responders in both arms). Furthermore, for each vaccination regimen, we defined the  
185 responder subgroups (excluding non-responders defined as subjects with undetectable neutralization titers  
186 at an initial 1:10 serum dilution in either group) and compared the fold-reduction for titers that could be  
187 quantified (see Table 2). In these subsets, we observed an approximate 15-fold reduction in GMT for most  
188 vaccinations, except BNT162b2, where the reduction was 28-fold at peak response. This was consistent



189 with the high frequency of non-responders in this subset, additionally arguing for weaker protection against  
190 the Omicron variant in this cohort.

191 Since BNT162b2 is very commonly used, we tested the neutralization potency in BNT162b2 recipients at  
192 approximately six months post immunization as well. Similar to the peak responses, we observed a  
193 significantly weaker neutralization of the Omicron compared to the B.1 pseudotype and only 47%  
194 responders against the newly emerging VoC (Fig. 2a). Beta neutralization was slightly reduced, whereas  
195 Delta neutralization was at the same levels as B.1 at the late time point (Fig. 2a). To understand the  
196 longitudinal dynamic of humoral immunity, we used paired sera from BNT162b2 vaccine recipients at four  
197 weeks (already shown in Fig. 1c) and at six months post second dose which allowed us to compare intra-  
198 individual titer changes over time (Fig. 2b-d). While the neutralization of B.1 (Fig. 2b) and of the Delta  
199 VoC (Fig. 2d) decreased significantly over time, the time dependent reduction was less pronounced for the  
200 Beta (Fig. 2c) or the Omicron VoC (Fig. 2e). Moreover, all Omicron responders identified early after  
201 vaccination had still detectable neutralizing capacity at the late time points and two additional responders  
202 were identified in the late phase only (Fig. 2e). Therefore, the differences in neutralization titers between  
203 B.1 and Omicron responders were less pronounced at the late time points than at peak response (Table 2).

204 In sum, homologous mRNA-1273 vaccination resulted in the highest responder rate, Ad26.CoV2.S in the  
205 lowest within the vaccination peak response phase, and a longitudinal follow-up showed that Omicron  
206 responses, while reduced, can be rather durable if present in the first place.

## 207 Discussion

208 We provide a comprehensive overview of neutralization responses from all currently available COVID-19  
209 vaccination schemes in the European Union and the UK not only towards the Omicron VoC, but also  
210 towards Beta and Delta VoC compared to the parental strain B.1. We expand on previous findings (11, 12)  
211 that neutralization towards Omicron is particular poor after vaccination with vector-based formulations  
212 even within the peak phase shortly after vaccination. Also consistent with other reports (13, 14), we  
213 observed a still surprisingly low cross-neutralization in BNT162b2 recipients. While some time differences  
214 exist between doses for homologous and heterologous vaccines, sampling periods after the complete  
215 scheme were within peak response making an earlier waning of BNT162b2-induced antibodies highly  
216 unlikely. While age impacts antibody titers and neutralization potency (23-25), our group of BNT162b2  
217 recipients is slightly younger compared to the other vaccinees making age an unlikely contributor to our  
218 observation. Additionally, no tendency became apparent for gender and comorbidities either. Considering  
219 our relatively small sample size, it is however possible that this low overall response in the BNT162b2  
220 group was a spurious observation. Nevertheless, samples showing any cross-neutralizing responses early  
221 on remained responsive to Omicron six months later. Notably, all mRNA-1273 recipients and 80% of those  
222 receiving any heterologous vaccination showed a detectable neutralization against Omicron in our analysis.  
223 It is not clear, why these vaccination protocols were more efficient against the Omicron pseudotype than  
224 BNT162b2, but it is indicative that the baseline neutralization against the B.1 pseudotype was stronger in  
225 all of them in our sample cohorts.

226 The detectable responsiveness to the Omicron pseudotype in all mRNA-1273 recipients differed from  
227 previous reports where usually several samples showed no measurable neutralization against Omicron (12,  
228 14, 26). This might be due to sampling differences, a result of increased sensitivity in our assay, or both.  
229 We chose responder rates as primary outcome because this is a less biased expression than fold changes if  
230 titers from non-responsive individuals are calculated. For the same reason, we used a non-parametric assay  
231 to evaluate differences, allowing us to include samples that were below detection threshold, but obviously  
232 very low in titer. Fold changes were calculated separately on a subset of samples that showed detectable  
233 titers in all circumstances. We observed an approximately 15-fold reduction in most vaccination regimens  
234 except BNT162b2, adding evidence that Omicron cross-neutralization was impaired in this cohort. Our  
235 studies has several limitations. First, sample numbers in our cohort are low. They are however comparable  
236 to the majority of other studies to date and are well-matched on age and sex. Second, while our mean 55

237 day sampling time period after Ad26.CoV2.S administration is slightly longer than the four week sampling  
238 interval of the other vaccination schemes, our results are in line with others who reported poor Omicron  
239 neutralization following vaccination with Ad26.CoV2.S both at one and five months after dosing (11, 12).  
240 Third, while self-reported information about a previous SARS-CoV-2 infection or vaccination can impact  
241 study outcome, two recent publications found a 98% consistency for vaccination type and 95% for  
242 vaccination date between self-reported and administrative records or a positive predictive value of 98.2%  
243 and a negative predictive value of 97.3% between a self-reported vaccination and the detection of SARS  
244 CoV-2 antibodies (27, 28). Last, we only examine vaccination-induced antibody titers, omitting from our  
245 study people with previous infections or boosters. While these information would be valuable, we could  
246 not provide this dataset in a reasonably short time. Hence, it remains to be determined if boosters or  
247 convalescence has impacts that specifically improve neutralization efficacy by defined vaccination  
248 protocols.

249 Following current recommendations, a booster vaccination is generally advised after six months in many  
250 countries. Although our results do not necessarily predict failure of vaccine effectiveness and omit  
251 measuring cellular immunity or non-neutralizing antibody effects, it does however suggest that active  
252 protection against the Omicron VoC may be reduced in many vaccinated individuals. Hence, booster  
253 vaccination might be advised at earlier stages, especially for at-risk groups in the absence of a precise and  
254 clinically relevant correlate of protection.

255 Overall, we provide further evidence that that amino acid mutations accumulated in the B.1.1.529 Spike  
256 protein serve to escape vaccine-induced protection. In the absence of conclusive data on infectivity and  
257 disease severity, development of adapted second generation vaccinations, booster doses and careful  
258 monitoring of future variants of concern appears warranted.

## 259 **Contributors**

260 MS, HJ, LCS conceived the study. MS, GK, BL, SC, NSM, SP and LCS procured funding. GK, BL, MS,  
261 MaH and DG designed the population-based cohort this study is based on. HJ, MS and LCS designed the  
262 experiments. HJ, HM, MYD, UR, LA, YK and TL performed the experiments. MHa, BK, MS, JH, MYD  
263 and HM performed data analysis. MS, HJ, HM, MYD generated figures and tables. MS, BK, HJ, LCS  
264 verified the underlying data. MHo, SP provided reagents. AD, DJ, JH, MS, BK, PH, BL, SC, MHa, DG,  
265 SG, JKH, VM, YvK were involved in sample or data collection and project administration. MS, HJ, LCS  
266 wrote the manuscript. All authors critically reviewed and approved the final manuscript.

## 267 **Declaration of Interest**

268 NSM was a speaker at Luminex user meetings in the past. The Natural and Medical Sciences Institute at  
269 the University of Tübingen is involved in applied research projects as a fee for services with the Luminex  
270 Corporation. The other authors declare no competing interest.

## 271 **Acknowledgments**

272 We want to thank again all parties involved in any capacity in making MuSPAD happen. Most of all the  
273 study participants for their willingness and commitment to make this study possible and all colleagues at  
274 the HZI, the Hannover Unified Biobank and the DRK Institute of Transfusion Medicine and  
275 Immunohematology who contributed to project administration, organization and sample processing. We  
276 thank Daniela Lenz, Ayse Barut, Inge Hollatz-Rangosch and Fawad Khan for excellent technical assistance  
277 during this study.

## 278 **Data Sharing Statement**

279 Raw data is provided with the manuscript. Additional data is available upon request from the corresponding  
280 authors.

## 281 **References**

- 282 1. WHO. WHO Coronavirus (COVID-19) Dashboard 2021 [Available from: <https://covid19.who.int/>.
- 283 2. Altmann DM, Boyton RJ, Beale R. Immunity to SARS-CoV-2 variants of concern. *Science*.  
284 2021;371(6534):1103-4.
- 285 3. Lopez Bernal J, Andrews N, Gower C, Gallagher E, Simmons R, Thelwall S, et al. Effectiveness of  
286 Covid-19 Vaccines against the B.1.617.2 (Delta) Variant. *N Engl J Med*. 2021;385(7):585-94.
- 287 4. Tao K, Tzou PL, Nouhin J, Gupta RK, de Oliveira T, Kosakovsky Pond SL, et al. The biological and  
288 clinical significance of emerging SARS-CoV-2 variants. *Nat Rev Genet*. 2021;22(12):757-73.
- 289 5. WHO. Classification of Omicron (B.1.1.529): SARS-CoV-2 Variant of Concern 2021 [Available  
290 from: [https://www.who.int/news/item/26-11-2021-classification-of-omicron-\(b.1.1.529\)-sars-cov-2-](https://www.who.int/news/item/26-11-2021-classification-of-omicron-(b.1.1.529)-sars-cov-2-variant-of-concern)  
291 [variant-of-concern](https://www.who.int/news/item/26-11-2021-classification-of-omicron-(b.1.1.529)-sars-cov-2-variant-of-concern).
- 292 6. Zhang L, Li Q, Liang Z, Li T, Liu S, Cui Q, et al. The significant immune escape of pseudotyped  
293 SARS-CoV-2 Variant Omicron. *Emerg Microbes Infect*. 2021:1-11.
- 294 7. Cele S, Jackson L, Khan K, Khoury DS, Moyo-Gwete T, Tegally H, et al. SARS-CoV-2 Omicron has  
295 extensive but incomplete escape of Pfizer BNT162b2 elicited neutralization and requires ACE2 for  
296 infection. *medRxiv*. 2021.
- 297 8. Dejnirattisai W, Shaw RH, Supasa P, Liu C, Stuart AS, Pollard AJ, et al. Reduced neutralisation of  
298 SARS-COV-2 Omicron-B. 1.1. 529 variant by post-immunisation serum. *medRxiv*. 2021.
- 299 9. Wilhelm A, Widera M, Grikscheit K, Toptan T, Schenk B, Pallas C, et al. Reduced Neutralization of  
300 SARS-CoV-2 Omicron Variant by Vaccine Sera and Monoclonal Antibodies. *medRxiv*. 2021.
- 301 10. Schubert M, Bertoglio F, Steinke S, Heine PA, Ynga-Durand MA, Zuo F, et al. Human serum from  
302 SARS-CoV-2 vaccinated and COVID-19 patients shows reduced binding to the RBD of SARS-CoV-2  
303 Omicron variant. *medRxiv*. 2021.
- 304 11. Schmidt F, Muecksch F, Weisblum Y, Silva JD, Bednarski E, Cho A, et al. Plasma neutralization  
305 properties of the SARS-CoV-2 Omicron variant. *medRxiv*. 2021.
- 306 12. Rössler A, Riepler L, Bante D, Laer Dv, Kimpel J. SARS-CoV-2 B.1.1.529 variant (Omicron) evades  
307 neutralization by sera from vaccinated and convalescent individuals. *medRxiv*. 2021.
- 308 13. Hoffmann M, Krüger N, Schulz S, Cossmann A, Rocha C, Kempf A, et al. The Omicron variant is  
309 highly resistant against antibody-mediated neutralization – implications for control of the COVID-19  
310 pandemic. *bioRxiv*. 2021.
- 311 14. Garcia-Beltran WF, St. Denis KJ, Hoelzemer A, Lam EC, Nitido AD, Sheehan ML, et al. mRNA-  
312 based COVID-19 vaccine boosters induce neutralizing immunity against SARS-CoV-2 Omicron variant.  
313 *medRxiv*. 2021.
- 314 15. Gorny D, Harries M, Glöckner S, Strengert M, Kerrinnes T, Heise J-K, et al. SARS-CoV-2  
315 seroprevalence in Germany. *Deutsches Ärzteblatt international*. 2021.
- 316 16. Becker M, Strengert M, Junker D, Kaiser PD, Kerrinnes T, Traenkle B, et al. Exploring beyond  
317 clinical routine SARS-CoV-2 serology using MultiCoV-Ab to evaluate endemic coronavirus cross-  
318 reactivity. *Nature communications*. 2021;12(1):1152.
- 319 17. Hoffmann M, Zhang L, Kruger N, Graichen L, Kleine-Weber H, Hofmann-Winkler H, et al. SARS-  
320 CoV-2 mutations acquired in mink reduce antibody-mediated neutralization. *Cell Rep*.  
321 2021;35(3):109017.
- 322 18. Hoffmann M, Arora P, Gross R, Seidel A, Hornich BF, Hahn AS, et al. SARS-CoV-2 variants B.1.351  
323 and P.1 escape from neutralizing antibodies. *Cell*. 2021;184(9):2384-93 e12.
- 324 19. Brinkmann C, Hoffmann M, Lubke A, Nehlmeier I, Kramer-Kuhl A, Winkler M, et al. The  
325 glycoprotein of vesicular stomatitis virus promotes release of virus-like particles from tetherin-positive  
326 cells. *PLoS One*. 2017;12(12):e0189073.



- 327 20. Kleine-Weber H, Elzayat MT, Wang L, Graham BS, Muller MA, Drosten C, et al. Mutations in the  
328 Spike Protein of Middle East Respiratory Syndrome Coronavirus Transmitted in Korea Increase  
329 Resistance to Antibody-Mediated Neutralization. *J Virol*. 2019;93(2).
- 330 21. Berger Rentsch M, Zimmer G. A vesicular stomatitis virus replicon-based bioassay for the rapid  
331 and sensitive determination of multi-species type I interferon. *PLoS One*. 2011;6(10):e25858.
- 332 22. Aggarwal A, Stella AO, Walker G, Akerman A, Milogiannakis V, Brilot F, et al. SARS-CoV-2  
333 Omicron: evasion of potent humoral responses and resistance to clinical immunotherapeutics relative to  
334 viral variants of concern. *medRxiv*. 2021:2021.12.14.21267772.
- 335 23. Naaber P, Tserel L, Kangro K, Sepp E, Jürjenson V, Adamson A, et al. Dynamics of antibody  
336 response to BNT162b2 vaccine after six months: a longitudinal prospective study. *The Lancet Regional  
337 Health - Europe*. 2021;10:100208.
- 338 24. Steensels D, Pierlet N, Penders J, Mesotten D, Heylen L. Comparison of SARS-CoV-2 Antibody  
339 Response Following Vaccination With BNT162b2 and mRNA-1273. *Jama*. 2021;326(15):1533-5.
- 340 25. Shrotri M, Fragaszy E, Geismar C, Nguyen V, Beale S, Braithwaite I, et al. Spike-antibody  
341 responses to ChAdOx1 and BNT162b2 vaccines by demographic and clinical factors (Virus Watch study).  
342 *medRxiv*. 2021:2021.05.12.21257102.
- 343 26. Doria-Rose NA, Shen X, Schmidt SD, O'Dell S, McDanal C, Feng W, et al. Booster of mRNA-1273  
344 Vaccine Reduces SARS-CoV-2 Omicron Escape from Neutralizing Antibodies. *medRxiv*.  
345 2021:2021.12.15.21267805.
- 346 27. Pritchard E, Matthews PC, Stoesser N, Eyre DW, Gethings O, Vihta K-D, et al. Impact of  
347 vaccination on new SARS-CoV-2 infections in the United Kingdom. *Nature Medicine*. 2021;27(8):1370-8.
- 348 28. Siegler AJ, Luisi N, Hall EW, Bradley H, Sanchez T, Lopman BA, et al. Trajectory of COVID-19  
349 Vaccine Hesitancy Over Time and Association of Initial Vaccine Hesitancy With Subsequent Vaccination.  
350 *JAMA Network Open*. 2021;4(9):e2126882-e.

351

352

353 **Table 1. Sample characteristics** (na: not applicable)  
 354

| Sample cohort (n)                              | $\Delta T$ (days) post-complete vaccination (mean, SD) | $\Delta T$ (days) between doses (mean, SD) | Age (years), median (IQR) | Sex (n, %) |           |
|------------------------------------------------|--------------------------------------------------------|--------------------------------------------|---------------------------|------------|-----------|
|                                                |                                                        |                                            |                           | Female     | Male      |
| two-dose BNT162b2 T1* (15)                     | 28.3 (4.8)                                             | 21.3 (1.2)                                 | 50 (39-56)                | 12 (80.0)  | 3 (20.0)  |
| two-dose BNT162b2 T2* (15)                     | 173.6 (11.4)                                           |                                            | 50 (40-57)                |            |           |
| two-dose mRNA-1273 (16)                        | 28.5 (4.2)                                             | 32.0 (6.1)                                 | 56 (54-68)                | 11 (68.8)  | 5 (31.2)  |
| first dose AZD1222, second dose mRNA-1273 (11) | 28.2 (4.4)                                             | 65.4 (21.6)                                | 68 (65-73)                | 7 (63.7)   | 4 (36.4)  |
| first dose AZD1222, second dose BNT162b2 (15)  | 26.0 (4.1)                                             | 76.2 (7.7)                                 | 67 (65-69)                | 4 (26.7)   | 11 (73.4) |
| two-dose AZD1222 (14)                          | 27.1 (1.2)                                             | 77.6 (1.8)                                 | 65 (63-69)                | 7 (50.0)   | 7 (50.0)  |
| one-dose Ad26.CoV2.S (11)                      | 55.3 (5.4)                                             | na                                         | 61 (58-63)                | 7 (63.6)   | 4 (36.4)  |

\* Two-dose BNT162b2 T1 and two-dose BNT162b2 T2 are paired longitudinal samples.

355  
356

**Table 2. Geometric means of responses and fold changes in Omicron responder subsets**

| Vaccination regimen                          | GMT (95% CI) of paired <u>responders</u>       |                        |                         |                      |
|----------------------------------------------|------------------------------------------------|------------------------|-------------------------|----------------------|
|                                              | B.1                                            | Beta                   | Delta                   | Omicron              |
| two-dose mRNA-1273                           | 526.0<br>(368.1-751.5)                         | 119.6<br>(70.7-202.5)  | 481.5<br>(70.7-202.5)   | 33.2<br>(21.2-52.2)  |
| first dose AZD1222,<br>second dose BNT162b2  | 902.8<br>(572.0-1425.0)                        | 173.9<br>(109.0-277.5) | 173.9<br>(109.0-277.5)  | 61.5<br>(44.0-85.9)  |
| first dose AZD1222,<br>second dose mRNA-1273 | 1323.0<br>(740.6-2363.0)                       | 368.9<br>(156.9-867.3) | 923.8<br>(418.5-2039.0) | 75.6<br>(41.2-138.9) |
| two-dose AZD1222                             | 186.4<br>(91.2-381.3)                          | 46.4<br>(20.8-103.5)   | 95.3<br>(41.5-232.9)    | 14.6<br>(7.0-30.5)   |
| one-dose Ad26.CoV2.S*                        | na                                             | na                     | na                      | na                   |
| two-dose BNT162b2 T1<br>**                   | 393.0<br>(213.5-723.6)                         | 56.6<br>(14.3-223.5)   | 503.5<br>(275.2-921.0)  | 13.7<br>(7.8-24.1)   |
| two-dose BNT162b2 T2<br>**                   | 82.6<br>(60.1-113.6)                           | 31.3<br>(16.8-58.2)    | 85.7<br>(51.4-142.7)    | 10.9<br>(7.3-16.5)   |
| Vaccination regimen                          | Fold change in GMT of paired <u>responders</u> |                        |                         |                      |
|                                              | B.1                                            | Beta                   | Delta                   | Omicron              |
| two-dose mRNA-1273                           | -                                              | -4.4                   | -1.1                    | -15.8                |
| first dose AZD1222,<br>second dose BNT162b2  | -                                              | -5.2                   | -1.6                    | -14.7                |
| first dose AZD1222,<br>second dose mRNA-1273 | -                                              | -3.6                   | -1.4                    | -17.5                |
| two-dose AZD1222                             | -                                              | -4.0                   | -1.9                    | -12.8                |
| one-dose Ad26.CoV2.S*                        | -                                              | na                     | na                      | na                   |
| two-dose BNT162b2 T1<br>**                   | -                                              | -6.9                   | -0.8                    | -28.7                |
| two-dose BNT162b2 T2<br>**                   | -                                              | -2.6                   | -1.0                    | -7.5                 |

\* Only one subject showed detectable neutralization titers in the Omicron assay.

\*\* Two-dose BNT162b2 T1 and two-dose BNT162b2 T2 are paired longitudinal samples.

357

358 **Figures with legends**

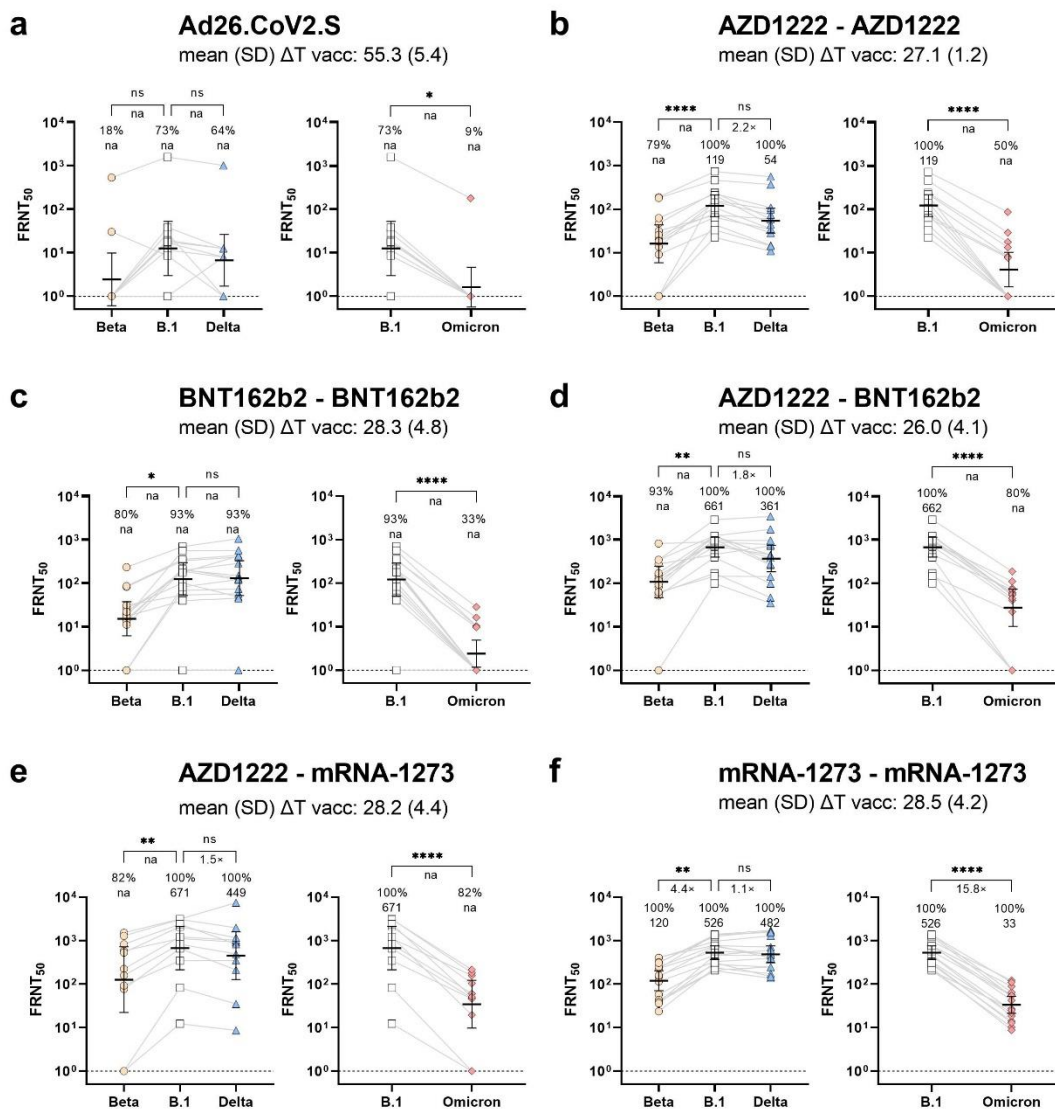

359  
360 **Fig. 1. Impact of SARS-CoV-2 vaccination schemes on neutralization response towards Omicron (B.1.1.529)**  
361 **variant.**

362 Vaccination-induced neutralization potency against Omicron (B.1.1.529), Beta (B. 1.351), Delta (B.1.617.2) or  
363 Wuhan (B.1) pseudotypes was measured in individuals who received a vector-based vaccination with single dose  
364 Ad26.CoV2.S (n=11, a), two doses of AZD1222 (n=14, b), two doses of mRNA vaccine BNT162b2 (n=15, c), a  
365 heterologous two-dose vaccination with AZD1222-BNT162b2 (n=15, d) or AZD1222-mRNA-1273 (n=11, e), or two  
366 doses of mRNA vaccine mRNA-1273 (n=16, f) 21 to 61 days after the last dose. FRNT<sub>50</sub> data is expressed for each  
367 serum sample, bold horizontal lines and whiskers are geometric means with 95% CI. Interconnecting lines represent  
368 sample data from the same donor. Non-neutralizing sample values were arbitrarily set to 1 for presentation purposes,  
369 indicated by a dashed line. Fold change in neutralization potency between SARS-CoV-2 wild-type and VoC  
370 pseudotypes is shown below p-values. Percentage (%) responder rates and FRNT<sub>50</sub> geometric mean titers (GMT)  
371 per SARS-CoV-2 pseudotype are shown above the individual measurements. Fold change in neutralization potency and  
372 GMTs for SARS-CoV-2 pseudotypes are only calculated for groups where all samples had a detectable neutralizing  
373 activity, or else not applicable (na) is stated. Time between sampling and full vaccination in days is displayed as mean  
374 and SD below the vaccination scheme. Statistical analysis was performed by paired non-parametric Friedman's test  
375 followed by a Dunn's multiple comparison analysis. Statistical significance was defined by a value of \* $<0.05$ ; \*\*  
376  $<0.01$ ; \*\*\* $<0.001$ ; \*\*\*\* $<0.0001$ .

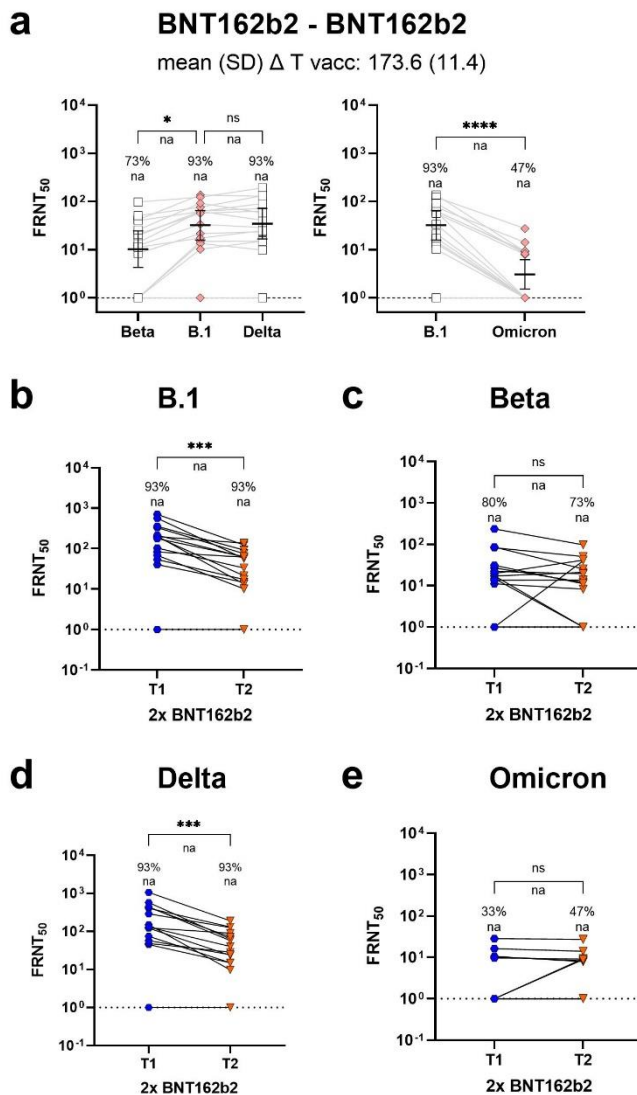

377

378 **Fig. 2. Longitudinal BNT162b2 neutralization response towards SARS-CoV-2 VoC Omicron (B.1.1.529).**  
 379 Neutralization capacity towards SARS-CoV-2 Omicron (B.1.1.529), Beta (B. 1.351), Delta (B.1.617.2) or Wuhan  
 380 (B.1) pseudotypes was analyzed approximately six months after a two-dose BNT162b2 vaccination (n=15, a).  
 381 Neutralization kinetic of paired longitudinal samples towards SARS-CoV-2 B.1 (b), Beta (c), Delta (d) and Omicron  
 382 (e) pseudotypes is shown between T1 (n=15; mean (SD)  $\Delta$ T after last dose: 28.3 (4.3)) and T2 (n=15; mean (SD)  $\Delta$ T  
 383 after last dose: 173.6 (11.4)). Peak neutralization responses of BNT162b2-vaccinated individuals from Figure 1c are  
 384 displayed for clarity and comparison (b-e). FRNT<sub>50</sub> data is expressed for each serum sample, bold horizontal lines and  
 385 whiskers are geometric means with 95% CI. Interconnecting lines represent sample data from the same donor (a-e).  
 386 Non-neutralizing samples were arbitrarily set to 1 for presentation purposes, indicated by a dashed line. Fold change  
 387 in neutralization potency between SARS-CoV-2 wild-type and VoC pseudotypes is shown below p-values. Percentage  
 388 (%) responder rates and FRNT<sub>50</sub> geometric mean titers (GMT) per SARS-CoV-2 pseudotype are shown above the  
 389 individual measurements. Fold change in neutralization potency and GMTs for SARS-CoV-2 pseudotypes are only  
 390 calculated for groups where all samples had a detectable neutralizing activity, or else not applicable (na) is stated.  
 391 Statistical analysis was performed by paired non-parametric Friedman's test followed by a Dunn's multiple comparison  
 392 analysis (a) or a by two-tailed Wilcoxon matched-pairs signed rank test (b-e). Statistical significance was defined by  
 393 a value of \*<0.05; \*\* <0.01; \*\*\*<0.001; \*\*\*\*<0.0001.
