# Supplementary material for: Diminished neutralization responses towards SARS-CoV-2 Omicron VoC after mRNA or vector-based COVID-19 vaccinations
Source: bioRxiv or medRxiv preprint supplement (doi:10.1101/2021.12.21.21267898), 2022-01-23
Supplement: Supplementary file [file media-1.pdf]

1 **Supplementary Material - Diminished neutralization responses towards SARS-CoV-2**  
2 **Omicron VoC after mRNA or vector-based COVID-19 vaccinations**

3 Henning Jacobsen<sup>#,1</sup>, Monika Strengert<sup>#,2,3</sup>, Henrike Maaß<sup>\*,1</sup>, Mario Alberto Ynga Durand<sup>\*,1</sup>, Barbora  
4 Kessel<sup>2</sup>, Manuela Harries<sup>2</sup>, Ulfert Rand<sup>1</sup>, Leila Abassi<sup>1</sup>, Yeonsu Kim<sup>1</sup>, Tatjana Lüddecke<sup>1</sup>, Pilar Hernandez<sup>2</sup>,  
5 Julia Ortmann<sup>2</sup>, Jana-Kristin Heise<sup>2</sup>, Stefanie Castell<sup>2</sup>, Daniela Gornyk<sup>2</sup>, Stephan Glöckner<sup>2</sup>, Vanessa  
6 Melhorn<sup>2</sup>, Yvonne Kemmling<sup>2</sup>, Berit Lange<sup>2,5</sup>, Alex Dulovic<sup>4</sup>, Julia Häring<sup>4</sup>, Daniel Junker<sup>4</sup>, Nicole  
7 Schneiderhan-Marra<sup>4</sup>, Markus Hoffmann<sup>6,7</sup>, Stefan Pöhlmann<sup>6,7</sup>, Gérard Krause<sup>2,3,5,§</sup>, Luka Cicin-Sain<sup>1,5,8,§</sup>

8 1 Helmholtz Centre for Infection Research, Department of Viral Immunology, Braunschweig, Germany

9 2 Helmholtz Centre for Infection Research, Department of Epidemiology, Braunschweig, Germany

10 3 TWINCORE, Centre for Experimental and Clinical Infection Research, a joint venture of the Hannover  
11 Medical School and the Helmholtz Centre for Infection Research, Hannover, Germany

12 4 NMI Natural and Medical Sciences Institute at the University of Tübingen, Reutlingen, Germany

13 5 German Centre for Infection Research (DZIF), partner site Hannover-Braunschweig, Germany

14 6 Deutsches Primatenzentrum, Leibniz-Institut für Primatenforschung, Göttingen, Germany

15 7 Faculty of Biology and Psychology, Georg-August-University Göttingen, Germany

16 8 Centre for Individualized Infection Medicine (CIIM), a joint venture of Helmholtz Centre for Infection  
17 Research and Medical School Hannover, Germany

18

19 # (first authors), \* (second authors), § (corresponding authors): these authors contributed equally.

20

21 Corresponding authors contact details:

22 Luka Cicin-Sain, Phone number: +49 (0)53161814616, Email address: [luka.cicin-sain@helmholtz-hzi.de](mailto:luka.cicin-sain@helmholtz-hzi.de),

23 Postal address: Inhoffenstraße 7, 38124 Braunschweig, Germany.

24

25

26 **Supplementary Table S1.** Comorbidities of study participants (NA: not available; CVD: cardiovascular disease  
 27

| Sample cohort (n)                              | Comorbidities (n, %)                                       | CVD (n, %) | Lung disease (n, %) | Diabetes (n, %) | Cancer (n, %) | Immuno-suppression (n, %) | Hypertension (n, %) |
|------------------------------------------------|------------------------------------------------------------|------------|---------------------|-----------------|---------------|---------------------------|---------------------|
| two-dose BNT162b2 T1* (15)                     | 0:9 (64.3)<br>1:4 (28.6)<br>2:1 (7.1)<br>>2: 0 (0)<br>1 NA | 0(0)       | 1 (7.1)             | 0 (0)           | 0 (0)         | 0 (0)                     | 5 (35.7)            |
| two-dose BNT162b2 T2* (15)                     | 0: 8 (53.3)<br>1: 5 (33.3)<br>2: 2 (13.3)<br>>2: 0 (0)     | 1 (6.7)    | 1 (6.7)             | 0 (0)           | 0 (0)         | 2 (13.3)                  | 5 (33.4)            |
| two-dose mRNA-1273 (16)                        | 0: 12 (75.0)<br>1: 4 (25.0)<br>2: 0 (0)<br>>2: 0 (0)       | 1 (6.3)    | 1 (6.3)             | 0 (0)           | 1 (6.3)       | 0 (0)                     | 1 (6.3)             |
| first dose AZD1222, second dose mRNA-1273 (11) | 0: 7 (63.6)<br>1: 3 (27.3)<br>2: 1 (9.1)<br>>2: 0 (0)      | 2 (18.2)   | 0 (0)               | 0 (0)           | 0 (0)         | 0 (0)                     | 3 (27.3)            |
| first dose AZD1222, second dose BNT162b2 (15)  | 0: 8 (53.3)<br>1: 3 (20.0)<br>2: 3 (20.0)<br>>2: 1 (6.7)   | 1 (6.7)    | 1 (6.7)             | 2 (13.3)        | 1 (6.7)       | 0 (0)                     | 7 (46.7)            |
| two-dose AZD1222 (14)                          | 0: 7 (50.0)<br>1: 6 (42.9)<br>1: 1 (7.1)<br>>2: 0 (0)      | 0 (0)      | 0 (0)               | 2 (14.3)        | 0 (0)         | 0 (0)                     | 6 (42.9)            |
| one-dose Ad26.CoV 2.S (11)                     | 0: 7 (63.6)<br>1: 3 (27.3)<br>2: 0 (0)<br>>2: 1 (9.1)      | 1 (9.1)    | 1 (9.1)             | 1 (9.1)         | 0 (0)         | 1 (9.1)                   | 4 (36.4)            |

\* Two-dose BNT162b2 T1 and two-dose BNT162b2 T2 are paired longitudinal samples.

28  
29  
30  
31  
32

**Supplementary Table S2.** Amino acid mutations of Spike proteins used for SARS-CoV-2 pseudotype construction compared to the parental strain B.1. Shared mutations among the constructs are highlighted in bold.

| <b>B.1.351 (Beta)</b><br><b>(EPI_ISL_700428)</b> | <b>B.1.617.2 (Delta)</b><br><b>(EPI_ISL_1921353)</b> | <b>B.1.1.529 (Omicron)</b><br><b>(EPI_ISL_6640919)</b> |
|--------------------------------------------------|------------------------------------------------------|--------------------------------------------------------|
|                                                  | T19R                                                 |                                                        |
|                                                  |                                                      | A67V                                                   |
|                                                  |                                                      | 69-70del                                               |
| D80A                                             |                                                      |                                                        |
|                                                  |                                                      | T95I                                                   |
|                                                  | <b>G142D</b>                                         | <b>G142D</b>                                           |
|                                                  |                                                      | 143-145del                                             |
|                                                  | E156G                                                |                                                        |
|                                                  | 157-158del                                           |                                                        |
|                                                  |                                                      | N211del/L212I                                          |
|                                                  |                                                      | Ins214EPE                                              |
| 242-244del                                       |                                                      |                                                        |
| R246I                                            |                                                      |                                                        |
|                                                  |                                                      | G339D                                                  |
|                                                  |                                                      | S371L                                                  |
|                                                  |                                                      | S373P                                                  |
|                                                  |                                                      | S375F                                                  |
| K417N                                            |                                                      | K417N                                                  |
|                                                  |                                                      | N440K                                                  |
|                                                  |                                                      | G446S                                                  |
|                                                  | L452R                                                |                                                        |
|                                                  |                                                      | S477N                                                  |
|                                                  | <b>T478K</b>                                         | <b>T478K</b>                                           |
| <b>E484K</b>                                     |                                                      | <b>E484A</b>                                           |
|                                                  |                                                      | Q493R                                                  |
|                                                  |                                                      | G496S                                                  |
|                                                  |                                                      | Q498R                                                  |
| <b>N501Y</b>                                     |                                                      | <b>N501Y</b>                                           |
|                                                  |                                                      | Y505H                                                  |
|                                                  |                                                      | T547K                                                  |
| <b>D614G</b>                                     | <b>D614G</b>                                         | <b>D614G</b>                                           |
|                                                  |                                                      | H655Y                                                  |
|                                                  |                                                      | N679K                                                  |
|                                                  | <b>P681R</b>                                         | <b>P681H</b>                                           |
| A701V                                            |                                                      |                                                        |
|                                                  |                                                      | N764K                                                  |
|                                                  |                                                      | D796Y                                                  |
|                                                  |                                                      | N856K                                                  |
|                                                  | D950N                                                |                                                        |
|                                                  |                                                      | Q954H                                                  |
|                                                  |                                                      | N969K                                                  |
|                                                  |                                                      | L981F                                                  |

33
